# Supplementary material for: Increased levels of soluble interleukin-6 receptor and CCL3 in COPD sputum
Source: PubMed Central journal article supplement (PMC4156958; doi:10.1186/s12931-014-0103-4), 2014-09-04
Supplement: 12931_2014_103_MOESM2_ESM.pdf [file 12931_2014_103_MOESM2_ESM.pdf]

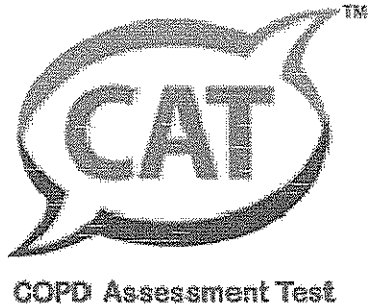

# Terms of Use

## TERMS OF USE

This site is controlled and operated by GlaxoSmithKline UK Limited (GSK) from its offices in the UK. This website has a specific section for members of the public and a specific section for healthcare professionals. "Healthcare professional" includes members of the medical, dental, pharmacy and nursing professions and other persons who in the course of their professional activities may prescribe, supply or administer a medicine and associated, appropriate, administrative staff.

The section for the public has been designed to provide general information to users in the UK about the COPD Assessment Test™. The section for healthcare professionals has been designed to provide UK healthcare professionals with information and education about the COPD Assessment Test™.

## NO WARRANTY

GSK makes no representation that material in the site is appropriate or available for use outside of the UK. Those who choose to access this site from other locations do so on their own initiative and are responsible for compliance with local laws, if and to the extent that local laws are applicable.

GSK uses reasonable efforts to update the website, but makes no representation or

warranty in respect of accuracy or lack of errors.

Use of the site is at the risk of the user. GSK takes no responsibility for direct, indirect or consequential loss from use of this site and all implied warranties are excluded to the extent permissible under English law.

GSK accepts no liability for viruses infecting the user following its use of the audio, video, data or text on the site.

## **HEALTHCARE INFORMATION**

While every effort has been made to ensure that healthcare information on this website is correct and up to date, the advice given on this website is of a general nature only and GSK makes no claims or warranties as to its accuracy, or usefulness.

**Specific medical advice should always be sought from a qualified medical practitioner.**

**FOR HEALTHCARE PROFESSIONALS ONLY:** Please note that approved prescribing information must guide the appropriate use of all medicines. **Before prescribing any medicine, healthcare professionals should consult the approved prescribing information for that medicine.**

## **INTELLECTUAL PROPERTY**

All material on this site is © Copyright 2009 - 2010, GlaxoSmithKline group of companies, or they have been granted permission to use such material except where specifically stated otherwise. Reproduction of part or all of the contents in any form is prohibited other than in accordance with the following permissions.

**Licence to copy for personal use or use by Healthcare Professionals (including for research purposes)**

You may read, view, print, download and copy the material on this website for your personal, non-commercial use only but only if:

1. Except for limited re-formatting you may not modify the COPD Assessment Test (CAT) or combine it with other instruments without prior written approval.
2. The 8 questions of the COPD Assessment Test (CAT) must appear verbatim, in order, and together as they are presented and not divided on separate pages.
3. All trademark and copyright information must be maintained as they appear on the bottom of the COPD Assessment Test (CAT) and on all copies.
4. You must utilise, copy and reproduce the COPD Assessment Test (CAT) in its entirety and if it appears on your website it must appear in its entirety in one screen with all trademark and copyright notices.
5. You acknowledge that GlaxoSmithKline owns the IP in the COPD Assessment Test (CAT) and agree to include an acknowledgement on any websites, documents or other materials referencing, reproducing or otherwise using the Instrument that GlaxoSmithKline owns the IP in the COPD Assessment Test (CAT).
6. The use of the Instrument shall be solely limited to this Study and you shall not use, reproduce, distribute or otherwise refer to the Instrument for any other purpose.
7. You shall not permit any third party to use, reproduce, distribute or otherwise refer to the Instrument for any purpose without the prior written consent of GlaxoSmithKline.

Nothing contained in this website should be construed as conferring, by implication or otherwise:

1. any licence or right under any patent or trademark of the GlaxoSmithKline group of companies or any third party; or
2. except as expressly provided in these Terms of Use, any licence or right under any copyright of the GlaxoSmithKline group of companies.

## **TRADE MARKS**

Trade marks owned by or licensed to the GlaxoSmithKline group of companies are indicated by an appropriate trade mark symbol, or are set off from surrounding text (for example by use of italics, bold or capital letters).

Where trade marks owned by third parties appear on this website, GlaxoSmithKline claims no ownership in, nor any affiliation with, the third party owner of such trade marks. Such third party trade marks are used only to identify the products and services of their respective owners, and no sponsorship or endorsement by GlaxoSmithKline should be inferred from the use of these marks.

## **HYPertext LINKS**

Certain hypertext links in this website will lead you to sites which are not under the control of GSK. When you activate any of these, you will leave the site.

GSK accepts no responsibility or liability for the contents of any third party site to which a hypertext link exists and gives no representation or warranty (express or implied) as to the information contained on such sites or any related goods or services (including, but not limited to, software downloads).

GSK has no control over the nature and contents of such sites and is not recommending those sites, the information they contain nor any third party's products or services.

**Please ensure you check the legal and privacy policy sections of any other GSK or third party site you link to.**

## **USE OF INFORMATION**

Communications from users (other than personal or health related information which is covered by GSK's **Privacy Policy**) are treated as non-confidential and non-proprietary and

GSK can use the information for any purpose, including reproduction and publication, and can use the ideas communicated for any purpose, including commercial ones.

## **JURISDICTION**

These Terms of Use and the content of this site shall be governed by English law.

## **CHANGES**

These Terms of Use may be revised at any time so the user is advised to check them regularly.

Page Last Updated: April 25, 2012

COPD Assessment Test and CAT logo is a trade mark of the GlaxoSmithKline group of companies.

©2009 GlaxoSmithKline group of companies. All rights reserved.
